# Supplementary material for: Potential applications of microbial genomics in nuclear non-proliferation
Source: Front Microbiol. 2024 Sep 18;15:1410820. doi: 10.3389/fmicb.2024.1410820 (PMC11445143; doi:10.3389/fmicb.2024.1410820)
Supplement: Supplementary file 1 [file Table_1.XLSX]

## Sheet: I.
Phylum	Class	Genus	Strain	Source	Contribution to bioremediation	Mechanism	Miscellaneous Notes	Citation
Bacillota	Clostridia	Thermoterrabacterium	Thermoterrabacterium ferriducens	-	Bioreduction of U(VI)	uramphite [(NH4)(UO2)(PO4)·3H2O] > ningyoite [CaU(PO4)2·H2O]		?
Pseudomonadota	Betaproteobacteria	Dechloromonas	Dechloromonas sp.	-	Bioreduction of U(VI)	-		?
Bacillota	Bacilli	Bacillus	Bacillus licheniformis	-	Bioaccumulation of Cs	-	-	Abdel-Razek-2015	http://article.appliedenvironmentalmicrobiology.com/pdf/JAEM-3-5-1.pdf
Bacillota	Bacilli	Bacillus	Bacillus pumilus	-	Bioaccumulation of Cs	-	-	Abdel-Razek-2015	http://article.appliedenvironmentalmicrobiology.com/pdf/JAEM-3-5-1.pdf
Thermodesulfobacteriota	Desulfuromonadia	Geobacter	Geobacter sp.	Acetate-stimulated sample from field site in Rifle, Colorado	Bioreduction of U(VI)	Reduction of Fe(III) and U(VI) simultaneously	Reduction of Fe(III)	Anderson-2003
Euryarchaeota	Halobacteria	Halobacterium	Halobacterium noricense DSM-15987	Waste Isolation Pilot Plant (WIPP) repository in New Mexico, USA	Biomineralization and Biosorption of U(VI)	U(VI) formed complexes with phosphoryl and carboxylate groups		Bader-2017	https://doi.org/10.1016/j.jhazmat.2016.12.053
Euryarchaeota	Halobacteria	Halobacterium	Halobacterium sp. putatively noricense	Waste Isolation Pilot Plant (WIPP) repository in New Mexico, USA	Biomineralization and Biosorption of U(VI)	U(VI) formed complexes with phosphoryl and carboxylate groups		Bader-2017	https://doi.org/10.1016/j.jhazmat.2016.12.053
Actinomycetota	Actinomycetes	Brachybacterium	Brachybacterium sp. G1	German salt dome Gorleben	Biosorption of U(VI)	U predominantly interacted with carboxylic groups		Bader-2018	https://doi.org/10.1371/journal.pone.0190953
Euryarchaeota	Halobacteria	Halobacterium	Halobacterium noricense DSM15987T	Waste Isolation Pilot Plant (WIPP) repository in New Mexico, USA	Biomineralization and Biosorption of U(VI)	U(VI) formed complexes with phosphoryl and carboxylate groups		Bader-2018	https://doi.org/10.1371/journal.pone.0190953
Bacillota	Bacilli	Bacillus	Bacillus sp. Y9−2	Oak Ridge Field Research Center in Tennessee, USA	Bioprecipitation of U(VI)	Acid phosphatase activity		Beazley-2007	https://doi.org/10.1021/es070567g
Pseudomonadota	Betaproteobacteria	Thiobacillus	Thiobacillus denitrificans	-	Biooxidation of U(IV)	Oxidizes uraninite coupled with nitrate consumption	Facultative anaerobe	Beller-2004
Pseudomonadota	Betaproteobacteria	Thiobacillus	Thiobacillus denitrificans	-	Biooxidation of U(IV)	Cytochrome c; nitrate-dependent	Anaerobic	Beller-2009
Thermodesulfobacteriota	Desulfuromonadia	Geobacter	Geobacter metallireducens	-	Biooxidation of U(IV)	Cytochrome c; nitrate-dependent	Anaerobic	Beller-2009
Pseudomonadota	Betaproteobacteria	Acidovorax	Acidovorax ebreus strain TPSY	groundwater collected from the U.S. Department of Energy Integrated Field Research Challenge site at Oak Ridge, TN	U(VI) resistant	pH ~7.0	Oxidation of Fe(II) in a nitrate-dependent manner	Byrne-Bailey-2010	https://doi.org/10.1128/JB.01449-09
Pseudomonadota	Gammaproteobacteria	Shewanella	Shewanella alga	Anaerobic sediment, Great Bay estuary, New Hampshire, USA	Bioreduction of U(VI)	-	Facultative anaerobe; reduction of Fe(III)/Mn(VI)/Co(III)-EDTA coupled to oxidation of organic acids/H2	Caccavo-1996	https://doi.org/10.1128/aem.62.12.4678-4682.1996
Actinomycetota	Actinomycetes	Arthrobacter	Arthrobacter sp. G975	-	Biosorption of U(VI)	Aqueous bicarbonate competes with U(VI)		Carvajal-2012	https://doi.org/10.1016/j.chemgeo.2012.08.018
Actinomycetota	Actinomycetes	Amycolatopsis	Amycolatopsis sp. K47	Uranium deposits	Biosorption of U(VI)	-		Celik-2017
Actinomycetota	Actinomycetes	Amycolatopsis	Amycolatopsis sp. K47	Manisa Koprubasi Kasar open-cast uranium mine	Biosorption of U(VI)	-		Celik-2018	https://doi.org/10.1007/s11270-018-3766-5
Bacillota	Bacilli	Bacillus	~Bacillus circulans	soil from uranium mine in Limpopo, South Africa where U = 168 mg/kg	Bioprecipitation of U(VI)	-		Chabalala-2010	https://doi.org/10.1016/j.mineng.2010.01.012
Pseudomonadota	Gammaproteobacteria	Acinetobacter	~Acinetobacter schindleri	Soil from a uranium mine in Limpopo, South Africa (168 mg U/kg)	Unknown	-		Chabalala-2010	https://doi.org/10.1016/j.mineng.2010.01.012
Pseudomonadota	Gammaproteobacteria	Enterobacter	~Enterobacter cloacae	Soil from a uranium mine in Limpopo, South Africa (168 mg U/kg)	U(VI) resistant	-	Facultative anaerobe	Chabalala-2010	https://doi.org/10.1016/j.mineng.2010.01.012
Pseudomonadota	Gammaproteobacteria	Klebsiella	~Klebsiella pneumoniae	soil from uranium mine in Limpopo, South Africa where U = 168 mg/kg	Bioreduction of U(VI)	U(VI)>U(IV) oxidation (?) and/or anaerobic U(VI) reduction at near-neutral pH	Reduction of nitrate	Chabalala-2010	https://doi.org/10.1016/j.mineng.2010.01.012
Pseudomonadota	Gammaproteobacteria	Pantoea	~Pantoea agglomerans	Soil from a uranium mine in Limpopo, South Africa (168 mg U/kg)	U(VI) resistant	-	facultatively anaerobic Fe(III) reducer capable of growing via the dissimilatory reduction of Fe(III), Mn(IV), and the toxic metal Cr(VI)	Chabalala-2010	https://doi.org/10.1016/j.mineng.2010.01.012
Pseudomonadota	Gammaproteobacteria	Pseudomonas	~Pseudomonas stutzeri	soil from uranium mine in Limpopo, South Africa where U = 168 mg/kg	Bioreduction of U(VI)	H2-dependent (pH 5-6)	Facultative anaerobe; denitrification	Chabalala-2010	https://doi.org/10.1016/j.mineng.2010.01.012
Pseudomonadota	Gammaproteobacteria	Pseudomonas	Pseudomonas aeruginosa	-	Biosorption of Cs	Review paper		Chellaiah-2018	https://doi.org/10.1007/s13201-018-0796-5
Pseudomonadota	Gammaproteobacteria	Pseudomonas	Pseudomonas sp.	-	Biosorption of U(VI)	-		Choi-2005	https://doi.org/10.1016/j.jhazmat.2008.03.065
Pseudomonadota	Gammaproteobacteria	Pseudomonas	Pseudomonas putida	-	Biosorption of U(VI)	-		Choi-2009	https://doi.org/10.1007/BF02910554
Bacillota	Bacilli	Bacillus	Bacillus sp. J005	Uranium mine	Bioaccumulation of U(VI)	-		Choudhary-2011	https://doi.org/10.1007/s11274-010-0637-7
Bacillota	Bacilli	Bacillus	Bacillus sp. J006	Uranium mine	Bioaccumulation of U(VI)	-		Choudhary-2011	https://doi.org/10.1007/s11274-010-0637-7
Bacillota	Bacilli	Bacillus	Bacillus sp. J008	Uranium mine	Bioaccumulation of U(VI)	-		Choudhary-2011	https://doi.org/10.1007/s11274-010-0637-7
Pseudomonadota	Gammaproteobacteria	Pseudomonas	Pseudomonas aeruginosa J007	Uranium mine	Bioaccumulation of U(VI)	U accumulates in a manner dependent on [U], pH, [Fe(III)] and is deposited within the cell envelope		Choudhary-2011	https://doi.org/10.1007/s11274-010-0637-7
Pseudomonadota	Gammaproteobacteria	Serratia	Serratia sp. J009	Uranium mine	Bioaccumulation of U(VI)	-		Choudhary-2011	https://doi.org/10.1007/s11274-010-0637-7
Pseudomonadota	Gammaproteobacteria	Shewanella	Shewanella saccharophilia GC-29	Freshwater sediments of the Potomac River, MD, USA	Bioreduction of U(VI)	-	Facultative anaerobe; reduction of NO3-/Mn(IV)/fumarate/malate/S2O32-/colloidal S0/2,6-anthraquinone disulfonate	Coates-1998	https://doi.org/10.1006/anae.1998.0172
Thermodesulfobacteriota	Desulfuromonadia	Geobacter	Geobacter chapellei 172T	Deep subsurface sediments	Bioreduction of U(VI)	-	Reduction of Fe(III) coupled to oxidation of formate/acetate/ethanol/lactate; reduction of Mn(IV)/fumarate	Coates-2001	https://doi.org/10.1099/00207713-51-2-581
Thermodesulfobacteriota	Desulfuromonadia	Geobacter	Geobacter hydrogenophilus H-2T	Contaminated aquifer	Bioreduction of U(VI)	U(VI) reduction coupled to the oxidation of butyrate/pyruvate/succinate	Reduction of Fe(III) coupled to oxidation of H2/formate/acetate/propionate/ethanol/benzoate; reduction of fumarate coupled to oxidation of butyrate/pyruvate/succinate	Coates-2001	https://doi.org/10.1099/00207713-51-2-581
Thermodesulfobacteriota	Desulfuromonadia	Geobacter	Geobacter metallireducens GS-15T	Aquatic sediments	Bioreduction of U(VI)	-	Reduction of Fe(III) coupled to oxidation of acetate/propionateeee/ethanol/benzoate; reduction of Mn(IV)/nitrate/AQDS/humic substances; oxidizes butyrate/valerate/isovalerate/toluene/phenol/p-cresol/benzaldehyde/pyruvate	Coates-2001	https://doi.org/10.1099/00207713-51-2-581
Actinomycetota	Actinomycetes	Micrococcus	Micrococcus luteus NRRL B-287	Northern Regional Research Centre, USA	Biosorption and Bioreduction of U(VI) (?)	U adsorption had a remarkably high K value		Cotoras-1992	https://doi.org/10.1080/09593339209385183
Actinomycetota	Actinomycetes	Micrococcus	Micrococcus sp. M	River and sea waters	Biosorption and Bioreduction of U(VI) (?)	-		Cotoras-1992	https://doi.org/10.1080/09593339209385183
Actinomycetota	Actinomycetes	Micrococcus	Micrococcus sp. S	River and sea waters	Biosorption and Bioreduction of U(VI) (?)	-		Cotoras-1992	https://doi.org/10.1080/09593339209385183
Actinomycetota	Actinomycetes	Micrococcus	Micrococcus sp. VM3a	River and sea waters	Biosorption and Bioreduction of U(VI) (?)	-		Cotoras-1992	https://doi.org/10.1080/09593339209385183
Bacillota	Bacilli	Bacillus	Bacillus sp. 10	Dr. B. Zamani, Michigan State University, USA	Biosorption and Bioreduction of U(VI) (?)	U adsorption had a high qm and K value		Cotoras-1992	https://doi.org/10.1080/09593339209385183
Bacillota	Bacilli	Bacillus	Bacillus sp. 25	Dr. B. Zamani, Michigan State University, USA	Biosorption and Bioreduction of U(VI) (?)	U adsorption remains constant across growth phases; remarkably high qm		Cotoras-1992	https://doi.org/10.1080/09593339209385183
Bacillota	Bacilli	Bacillus	Bacillus subtilis ATCC 6633	Dr. S. Avendaño, IDIEF, University of Chile	Biosorption and Bioreduction of U(VI) (?)	U adsorption increases during cell growth		Cotoras-1992	https://doi.org/10.1080/09593339209385183
Nitrospirota	Nitrospiria	Leptospirillum	Leptospirillum ferrooxidans A3	Uranium mineral heap, Mina Fe, Saelices el Chibo, Ciudad Rodrigo, Salamanca, Spain	Bioreduction of U(VI)	Oxidizes Fe(II) to Fe(III)	Oxidation of Fe(II)	de-Siloniz-1991	de Silóniz, M. I.; Lorenzo, P.; Perera, J. Distribution of Oxidizing Bacterial Activities and Characterization of Bioleaching-Related Microorganisms in a Uranium Mineral Heap. Microbiologia 1991, 7 (2), 82–89.
Pseudomonadota	Betaproteobacteria	Thiobacillus	Thiobacillus acidophilus	Uranium mineral heap, Mina Fe, Saelices el Chibo, Ciudad Rodrigo, Salamanca, Spain	Bioreduction of U(VI)	-		de-Siloniz-1991	de Silóniz, M. I.; Lorenzo, P.; Perera, J. Distribution of Oxidizing Bacterial Activities and Characterization of Bioleaching-Related Microorganisms in a Uranium Mineral Heap. Microbiologia 1991, 7 (2), 82–89.
Pseudomonadota	Betaproteobacteria	Thiobacillus	Thiobacillus ferrooxidans 1.18	Uranium mineral heap, Mina Fe, Saelices el Chibo, Ciudad Rodrigo, Salamanca, Spain	Bioreduction of U(VI)	Oxidizes Fe(II) to Fe(III)	Oxidation of Fe(II)	de-Siloniz-1991	de Silóniz, M. I.; Lorenzo, P.; Perera, J. Distribution of Oxidizing Bacterial Activities and Characterization of Bioleaching-Related Microorganisms in a Uranium Mineral Heap. Microbiologia 1991, 7 (2), 82–89.
Pseudomonadota	Betaproteobacteria	Thiobacillus	Thiobacillus thiooxidans	Uranium mineral heap, Mina Fe, Saelices el Chibo, Ciudad Rodrigo, Salamanca, Spain	Bioreduction of U(VI)	Oxidizes S	Oxidation of S	de-Siloniz-1991	de Silóniz, M. I.; Lorenzo, P.; Perera, J. Distribution of Oxidizing Bacterial Activities and Characterization of Bioleaching-Related Microorganisms in a Uranium Mineral Heap. Microbiologia 1991, 7 (2), 82–89.
Pseudomonadota	Betaproteobacteria	Thiobacillus	Thiobacillus acidophilus	-	Biooxidation of U(IV)	Oxidation of Fe(II) to Fe(III)	Oxidation of Fe(II)	DiSpirito-1981	https://www.tandfonline.com/doi/abs/10.1080/01490458109377767
Pseudomonadota	Betaproteobacteria	Thiobacillus	Thiobacillus ferrooxidans	-	Biooxidation of U(IV)	Oxidation of Fe(II) to Fe(III)	Oxidation of Fe(II)	DiSpirito-1981	https://www.tandfonline.com/doi/abs/10.1080/01490458109377767
Pseudomonadota	Betaproteobacteria	Thiobacillus	Thiobacillus ferrooxidans strain TFI-35	Martin et al. 1981	Biooxidation of U(IV)	Oxidation of Fe(II) to Fe(III)	Oxidation of Fe(II)	DiSpirito-1982ab	https://link.springer.com/article/10.1007/BF00943766, https://link.springer.com/article/10.1007/BF00943765
Bacillota	Clostridia	Desulfitobacterium	Desulfitobacterium chlororespirans strain Co23	compost soil	Bioreduction of U(VI)	U(IV) product was a phase or mineral composed of mononuclear U(IV) atoms closely surrounded by light element shells	Anaerobic	Fletcher-2010	https://doi.org/10.1021/es903636c
Bacillota	Clostridia	Desulfitobacterium	Desulfitobacterium dehalogenans strain JW/IU-DC1	methanogenic lake sediment	Bioreduction of U(VI)	-	Anaerobic	Fletcher-2010	https://doi.org/10.1021/es903636c
Bacillota	Clostridia	Desulfitobacterium	Desulfitobacterium hafniense strain JH1	contaminated site	Bioreduction of U(VI)	-	Anaerobic; reductive dechloronation	Fletcher-2010	https://doi.org/10.1021/es903636c
Bacillota	Clostridia	Desulfitobacterium	Desulfitobacterium sp. strain PCE1	tetrachloroethene-dechlorinating enrichment culture	Bioreduction of U(VI)	-	Anaerobic; reductive dechloronation; cytochrome c	Fletcher-2010	https://doi.org/10.1021/es903636c
Bacillota	Clostridia	Desulfitobacterium	Desulfitobacterium sp. strain Viet1	?	Bioreduction of U(VI)	-	Reductive dechloronation	Fletcher-2010	https://doi.org/10.1021/es903636c
Bacillota	Bacilli	Bacillus	Bacillus subtilis	Soil from a uranium mine	Biosorption of U(VI)	U(VI) formed complexes with neutral phosphate (POH) and deprotonated carboxyl (COO-) groups on the cell surface in a pH dependent manner		Fowle-2000	https://doi.org/10.1021/es991356h
Bacillota	Clostridia	Clostridium	Clostridium sp. ATCC 53464	American Type Culture Collection, Rockville, MD	Bioreduction of U(VI)	U(VI) reduction only occured in growing or resting cells; cell growth decreased		Francis-1994	https://doi.org/10.1021/es00053a016
Bacillota	Bacilli	Bacillus	Bacillus subtilis	Waste Isolation Pilot Plant (WIPP) in New Mexico, USA	Bioaccumulation and/or Biosorption of U(VI)	U associates with the cell surface as irregularly shaped grains; phosphoryl groups are involved		Francis-2004	https://doi.org/10.1524/ract.92.8.481.39281
Bacillota	Clostridia	Haloanaerobium	Haloanaerobium praevalens	Waste Isolation Pilot Plant (WIPP) in New Mexico, USA	Bioaccumulation and/or Biosorption of U(VI)	U associates with the cell surface as spikey deposits; phosphoryl groups are involved	Halophilic	Francis-2004	https://doi.org/10.1524/ract.92.8.481.39281
Euryarchaeota	Halobacteria	Halobacterium	Halobacterium halobium	Waste Isolation Pilot Plant (WIPP) in New Mexico, USA	Bioaccumulation and/or Biosorption of U(VI)	U associates with the cell surface as dense deposits; phosphoryl groups are involved	Halophilic	Francis-2004	https://doi.org/10.1524/ract.92.8.481.39281
Pseudomonadota	Gammaproteobacteria	Halomonas	Halomonas sp.	Waste Isolation Pilot Plant (WIPP) in New Mexico, USA	Bioaccumulation and/or Biosorption of U(VI)	U accumulates on the cell surface and intracellularly as electron-dense discrete granules; phosphoryl groups are involved	Halophilic	Francis-2004	https://doi.org/10.1524/ract.92.8.481.39281
Pseudomonadota	Gammaproteobacteria	Pseudomonas	Pseudomonas fluorescens	Waste Isolation Pilot Plant (WIPP) in New Mexico, USA	Bioaccumulation and/or Biosorption of U(VI)	U associates with the cell surface; phosphoryl groups are involved		Francis-2004	https://doi.org/10.1524/ract.92.8.481.39281
Bacillota	Clostridia	Clostridium	Clostridium sp. ATCC 53464	?	Bioreduction of U(VI)	anaerobic reduction of dinuclear 2:2 U(VI):citric acid complex to a biligand mononuclear 1:2 U(IV):citric acid complex (did not precipitate), increasing pH	Anaerobic; reduction of Fe(III), Mn(IV), Pu(IV), Tc(VI); nitrogen-fixing; fermentative	Francis-2008	https://doi.org/10.1021/es801045m
Bacillota	Clostridia	Clostridium	Clostridium sphenoides ATCC 19403	?	Bioreduction of U(VI)	-	Anaerobic; reduction of Fe(III), Mn(IV), Pu(IV), Tc(VI); fermentative	Francis-2008	https://doi.org/10.1021/es801045m
Pseudomonadota	Gammaproteobacteria	Shewanella	Shewanella putrefaciens CN32	-	Bioreduction of U(VI)	-	Reduction of Fe(III)	Fredrickson-2000	https://doi.org/10.1016/S0016-7037(00)00397-5
Actinomycetota	Actinomycetes	Streptomyces	Streptomyces longwoodensis ATCC 29251	-	Bioaccumulation and/or Biosorption of U(VI)	U(VI) binds at the cell wall and competes with H+/Pb; intracellular uptake of U(VI) is correlated with [P]		Friis-1986	https://doi.org/10.1002/bit.260280105
Thermoproteota	Thermoprotei	Metallosphaera	Metallosphaera prunae	Smoldering slag heap, U mine,Thüringen, Germany	Biooxidation of U(IV)	-		Fuchs-1995	https://doi.org/10.1016/S0723-2020(11)80416-9
Actinomycetota	Actinomycetes	Microbacterium	Microbacterium sp.	Chernobyl	U(VI) resistant	-		Gallois-2018
Bacillota	Clostridia	Clostridium	Clostridium sphenoides ATCC 19403	Military facility near Chesapeake Bay, MD and the ORFRC at Oak Ridge, TN	Bioreduction of U(VI)	Anaerobic reduction of dinuclear 2:2 U(VI):citric acid complex to a biligand mononuclear 1:2 U(IV):citric acid complex (did not precipitate) in a nitrate-independent manner (pH 6.5)		Gao-2008	https://doi.org/10.1128/AEM.00239-08
Bacillota	Clostridia	Clostridium	Clostridium acetobutylicum ATCC 824	Military facility near Chesapeake Bay, MD and the ORFRC at Oak Ridge, TN	Bioreduction of U(VI)	Anaerobic reduction of U(VI) in a nitrate-independent manner (pH 4.7-5.8)		Gao-2008	https://doi.org/10.1128/AEM.00239-08
Bacillota	Clostridia	Clostridium	Clostridium pasteurianum ATCC 7040	Military facility near Chesapeake Bay, MD and the ORFRC at Oak Ridge, TN	Bioreduction of U(VI)	Anaerobic reduction of U(VI) in a nitrate-independent manner (pH 5.8)		Gao-2008	https://doi.org/10.1128/AEM.00239-08
Bacillota	Clostridia	Clostridium	Clostridium sp. ATCC 53464	Military facility near Chesapeake Bay, MD and the ORFRC at Oak Ridge, TN	Bioreduction of U(VI)	Anaerobic reduction of U(VI) in a nitrate-independent manner (pH 3.0-5.2)		Gao-2008	https://doi.org/10.1128/AEM.00239-08
Myxococcota	Myxococcia	Myxococcus	Myxococcus xanthus CECT 422	Spanish Type Culture Collection, Burjasot, Valencia	Biosorption of U(VI)	U adsorption at the cell wall and inside the extracellular mucopolysaccharide in a pH-dependent manner		Gonzalez-Munoz-1997	https://doi.org/10.1016/S0964-8305(97)00041-3
Bacillota	Bacilli	Bacillus	Bacillus subtilis	-	Biosorption of U(VI)	U(VI) formed complexes with hydroxide, carbonate, and calcium--carbonate groups on the cell wall		Gorman-Lewis-2005	https://doi.org/10.1021/es047957c
Pseudomonadota	Betaproteobacteria	Thiobacillus	Thiobacillus ferrooxidans	-	Biooxidation of U(IV)	Oxidation of Fe(II) to Fe(III)	Oxidation of Fe(II)	Guay-1977	https://onlinelibrary.wiley.com/doi/abs/10.1002/bit.260190509
Euryarchaeota	Methanomicrobia	Methanosarcina	Methanosarcina barkeri	-	Bioreduction of U(VI)	U(VI) reduction coupled to acetate oxidation; Fe(III)-independent		Holmes-2017	https://doi.org/10.1101/202242
Pseudomonadota	Gammaproteobacteria	Pseudomonas	Pseudomonas aeruginosa CSU	Soil and sediment from a streambed in North Carolina, USA	Biosorption of U(VI)	U competes with H+; adsorption is inhibited by Fe(III)>Fe(II)>Al(III)>Pb(II)>Cu(II)>Cr(III)>Cd(II)/Mn(II)/Ba(II)/Co(II)		Hu-1996	https://doi.org/10.1002/(SICI)1097-0290(19960720)51:2%3C237::AID-BIT14%3E3.0.CO;2-J
Pseudomonadota	Betaproteobacteria	Acidovorax	Acidovorax sp. Strain NO1	gold mine soil	U(VI) resistant	-	Oxidation of Arsenite; facultative anaerobe	Huang-2012	https://doi.org/10.1128/JB.06814-11
Pseudomonadota	Betaproteobacteria	Thiobacillus	Thiobacillus cuprinus	Solfatara fields in Iceland and uranium mine in Germany	Biomobilization of U(VI)	Acidophilic (pH 3-4)	S	Huber-1990	https://doi.org/10.1128/aem.56.2.315-322.1990
Myxococcota	Myxococcia	Anaeromyxobacter	Anaeromyxobacter sp. Fw109-5	nitrate- and uranium-contaminated subsurface sediment of the Oak Ridge Integrated Field-Scale Subsurface Research Challenge (IFC) site, Oak Ridge Reservation, TN	Bioreduction of U(VI)	Denitrification (?)	Anaerobic, reduction of chlorinated phenols, O2, nitrate, nitrite, NO, ferric iron, arsenate, MnO2, Tc(VII)	Hwang-2015	https://doi.org/10.1128/genomeA.01449-14
Actinomycetota	Actinomycetes	Arthrobacter	Arthrobacter sp.	Metal-enriched U ore from the underground mine gallery (depth 850 m) of the Jaduguda U mine in India	U(VI) resistant	-		Islam-2016	https://doi.org/10.1016/j.ecoenv.2016.01.001
Actinomycetota	Actinomycetes	Microbacterium	Microbacterium sp.	Metal-enriched U ore from the underground mine gallery (depth 850 m) of the Jaduguda U mine in India				Islam-2016	https://doi.org/10.1016/j.ecoenv.2016.01.001
Bacillota	Bacilli	Paenibacillus	Paenibacillus sp.	Metal-enriched U ore from the underground mine gallery (depth 850 m) of the Jaduguda U mine in India				Islam-2016	https://doi.org/10.1016/j.ecoenv.2016.01.001
Pseudomonadota	Alphaproteobacteria	Ochrobactrum	Ochrobactrum sp.	Metal-enriched U ore from the underground mine gallery (depth 850 m) of the Jaduguda U mine in India	U(VI) resistant	-		Islam-2016	https://doi.org/10.1016/j.ecoenv.2016.01.001
Pseudomonadota	Alphaproteobacteria	Rhizobium	Rhizobium sp.	Metal-enriched U ore from the underground mine gallery (depth 850 m) of the Jaduguda U mine in India	U(VI) resistant	-		Islam-2016	https://doi.org/10.1016/j.ecoenv.2016.01.001
Pseudomonadota	Betaproteobacteria	Achromobacter	Achromobacter sp.	Metal-enriched U ore from the underground mine gallery (depth 850 m) of the Jaduguda U mine in India	U(VI) resistant	-		Islam-2016	https://doi.org/10.1016/j.ecoenv.2016.01.001
Pseudomonadota	Betaproteobacteria	Comamonas	Comamonas sp.	Metal-enriched U ore from the underground mine gallery (depth 850 m) of the Jaduguda U mine in India	U(VI) resistant	-		Islam-2016	https://doi.org/10.1016/j.ecoenv.2016.01.001
Pseudomonadota	Betaproteobacteria	Cupriavidus	Cuprividus sp.	Metal-enriched U ore from the underground mine gallery (depth 850 m) of the Jaduguda U mine in India	U(VI) resistant	-		Islam-2016	https://doi.org/10.1016/j.ecoenv.2016.01.001
Pseudomonadota	Betaproteobacteria	Pigmentiphaga	Pigmentiphaga sp.	Metal-enriched U ore from the underground mine gallery (depth 850 m) of the Jaduguda U mine in India	U(VI) resistant	-		Islam-2016	https://doi.org/10.1016/j.ecoenv.2016.01.001
Pseudomonadota	Gammaproteobacteria	Acinetobacter	Acinetobacter sp.	Metal-enriched U ore from the underground mine gallery (depth 850 m) of the Jaduguda U mine in India				Islam-2016	https://doi.org/10.1016/j.ecoenv.2016.01.001
Pseudomonadota	Gammaproteobacteria	Enterobacter	Enterobacter sp.	Metal-enriched U ore from the underground mine gallery (depth 850 m) of the Jaduguda U mine in India	U(VI) resistant	-		Islam-2016	https://doi.org/10.1016/j.ecoenv.2016.01.001
Pseudomonadota	Gammaproteobacteria	Klebsiella	Klebsiella sp.	Metal-enriched U ore from the underground mine gallery (depth 850 m) of the Jaduguda U mine in India	U(VI) resistant	-		Islam-2016	https://doi.org/10.1016/j.ecoenv.2016.01.001
Pseudomonadota	Gammaproteobacteria	Pseudomonas	Pseudomonas sp.	Metal-enriched U ore from the underground mine gallery (depth 850 m) of the Jaduguda U mine in India	U(VI) resistant	-		Islam-2016	https://doi.org/10.1016/j.ecoenv.2016.01.001
Pseudomonadota	Gammaproteobacteria	Stenotrophomonas	Stenotrophomonas sp.	Metal-enriched U ore from the underground mine gallery (depth 850 m) of the Jaduguda U mine in India	U(VI) resistant	-		Islam-2016	https://doi.org/10.1016/j.ecoenv.2016.01.001
Myxococcota	Myxococcia	Myxococcus	Myxococcus xanthus	-	Biosorption of U(VI)	U(VI) coordinated with organic phosphate groups at the cell surface (pH 2.0)		Jroundi-2007	https://www.tandfonline.com/doi/full/10.1080/01490450701437651
Bacillota	Clostridia	Desulfotomaculum	Desulfotomaculum reducens MI-1	-	U(VI) resistant	-		Junier-2009
Actinomycetota	Actinomycetes	Streptomyces	Streptomyces sp. CuOff24	-	Biosorption of Sr2+	-		Kamala-2019
Pseudomonadota	Gammaproteobacteria	Pseudomonas	Pseudomonas aeruginosa PAO1	-	Biosorption of Cs	Blocks K+		Kang-2017	https://doi.org/10.1016/j.jhazmat.2017.05.050
Thermoproteota	Thermoprotei	Pyrobaculum	Pyrobaculum islandicum	-	Bioreduction of U(VI)	-		Kashefi-2000	https://journals.asm.org/doi/full/10.1128/aem.66.3.1050-1056.2000
Pseudomonadota	Gammaproteobacteria	Pseudomonas	Pseudomonas aeruginosa strain BU2	-	Biosorption of U(VI)	-		Kazy-2008
Bacillota	Clostridia	Thermoterrabacterium	Thermoterrabacterium ferrireducens	-	Bioreduction of U(VI)	Organotrophic growth coupled to reduction of U(VI) phosphate		Khijniak-2005
Deinococcota	Deinococci	Thermus	Thermus sp. SA-01	Groundwater 3.2 km depth in a South African gold mine	Bioreduction of U(VI)	U(VI) reduction coupled to the oxidation of organic compounds; independent of nitrate/sulfur oxyanions/fumarate	Reduction of Fe(III)/O2/NO3-/S0/Mn(IV)/Co(III)-EDTA/Cr(VI) coupled to oxidation of organic compounds	Kieft-1999	https://doi.org/10.1128/AEM.65.3.1214-1221.1999
Pseudomonadota	Betaproteobacteria	Burkholderia	~Burkholderia fungorum	alluvial sediments located between 3-6 m below ground surface at Department of Energy’s Integrated Field-Scale Subsurface Research Challenge Site (IFRC) at Rifle, Colorado	Bioreduction of U(VI)	U(VI) reduction coupled to acetate oxidation		Koribanics-2015	https://doi.org/10.1371/journal.pone.0123378
Pseudomonadota	Gammaproteobacteria	Serratia	Serratia marcescens ATCC 13880	sub-surface soil of a uranium ore deposit site of Domiasiat	Biosorption of U(VI)	U adsorption and resistance in a pH-dependent manner		Kumar-2011	https://doi.org/10.1007/s12275-011-0366-0
Pseudomonadota	Betaproteobacteria	Dechlorosoma	Dechlorosoma suillum	Swine waste lagoon	Biosorption of U(VI)	U(VI) formed bidentate and tridentate inner-sphere complexes with Fe(III) oxides	Oxidation of Fe(II) in a nitrate/chlorate-dependent manner, anaerobic	Lack-2002	https://doi.org/10.1128/AEM.68.6.2704-2710.2002
Bacillota	Bacilli	Bacillus	Bacillus sp. (dwc-2)	Radioactive waste disposal site, China	Bioaccumulation and/or Biosorption of U(VI)	U accumulates intracellularly, ion-exchange and complexation of U		Li-2014	https://www.sciencedirect.com/science/article/pii/S0265931X14001027
Actinomycetota	Actinomycetes	Streptomyces	Streptomyces sporoverrucosus dwc-3	Potential disposal site for (ultra-)low uraniferous radioactive waste in China	Biosorption of U(VI)	U binds to amino, phosphate, and carboxyl groups at the cell wall (pH 3.0)		Li-2016	https://www.sciencedirect.com/science/article/pii/S1001074215003174
Pseudomonadota	Gammaproteobacteria	Shewanella	Shewanella oneidensis MR-1	-	Bioreduction of U(VI)	-		Liu-2006
Pseudomonadota	Gammaproteobacteria	Shewanella	Shewanella oneidensis MR-1	-	Bioreduction of U(VI)	-		Liu-2007
Pseudomonadota	Alphaproteobacteria	Rhodopseudomonas	Rhodopseudomonas palustris	-	Biosorption of U(VI)	Unknown		Llorens-2012	https://journals.plos.org/plosone/article?id=10.1371/journal.pone.0051783
Pseudomonadota	Betaproteobacteria	Cupriavidus	Cupriavidus metallidurans CH34	-	Biosorption of U(VI)	U(VI) formed complexes with phosphoryl and carboxyl groups in the LPS layer		Llorens-2012	https://journals.plos.org/plosone/article?id=10.1371/journal.pone.0051783
Thermodesulfobacteriota	Desulfovibrionia	Desulfovibrio	Desulfovibrio desulfuricans ATCC 29577	American Type Culture Collection, Rockville, MD	Bioreduction of U(VI)	U(VI) competes with Cu (pH 4.0, 7.4)	Reduction of SO42-	Lovley-1992a	https://doi.org/10.1021/es00035a023
Thermodesulfobacteriota	Desulfovibrionia	Desulfovibrio	Desulfovibrio desulfuricans ATCC 29577	American Type Culture Collection, Rockville, MD	Bioreduction of U(VI)	Reduction of SO42- and U(VI) simultaneously	Reduction of SO42-	Lovley-1992b	https://doi.org/10.1128/aem.58.3.850-856.1992
Thermodesulfobacteriota	Desulfovibrionia	Desulfovibrio	Desulfovibrio baarsii DSM 2075	German Collection of Microorganisms (DSM), Braunschweig, Germany	Bioreduction of U(VI)	R−POH0 + UO22+ ⇔ R−POH−UO22+ (log K = 11.8 ± 0.2) and R−COO- + UO22+ ⇔ R−COO−UO2+ (log K = 5.4 ± 0.2)	Reduction of Fe(III)	Lovley-1993a	Lovley, D. R.; Roden, E. E.; Phillips, E. J. P.; Woodward, J. C. Enzymatic Iron and Uranium Reduction by Sulfate-Reducing Bacteria. Marine Geology 1993, 113, 41–53.
Thermodesulfobacteriota	Desulfovibrionia	Desulfovibrio	Desulfovibrio baculatus DSM 1741	German Collection of Microorganisms (DSM), Braunschweig, Germany	Bioreduction of U(VI)	-	Reduction of Fe(III)	Lovley-1993a	Lovley, D. R.; Roden, E. E.; Phillips, E. J. P.; Woodward, J. C. Enzymatic Iron and Uranium Reduction by Sulfate-Reducing Bacteria. Marine Geology 1993, 113, 41–53.
Thermodesulfobacteriota	Desulfovibrionia	Desulfovibrio	Desulfovibrio desulfuricans ATCC 29577	American Type Culture Collection, Rockville, MD	Bioreduction of U(VI)	-	Reduction of Fe(III)	Lovley-1993a	Lovley, D. R.; Roden, E. E.; Phillips, E. J. P.; Woodward, J. C. Enzymatic Iron and Uranium Reduction by Sulfate-Reducing Bacteria. Marine Geology 1993, 113, 41–53.
Thermodesulfobacteriota	Desulfovibrionia	Desulfovibrio	Desulfovibrio sulfodismutans DSM 3696	German Collection of Microorganisms (DSM), Braunschweig, Germany	Bioreduction of U(VI)	-	Reduction of Fe(III)	Lovley-1993a	Lovley, D. R.; Roden, E. E.; Phillips, E. J. P.; Woodward, J. C. Enzymatic Iron and Uranium Reduction by Sulfate-Reducing Bacteria. Marine Geology 1993, 113, 41–53.
Thermodesulfobacteriota	Desulfovibrionia	Desulfovibrio	Desulfovibrio vulgaris ATCC 29579	American Type Culture Collection, Rockville, MD	Bioprecipitation and Bioreduction of U(VI)	Uraninite precipitates following reduction	Reduction of Fe(III); reduction of SO42-	Lovley-1993a	Lovley, D. R.; Roden, E. E.; Phillips, E. J. P.; Woodward, J. C. Enzymatic Iron and Uranium Reduction by Sulfate-Reducing Bacteria. Marine Geology 1993, 113, 41–53.
Thermodesulfobacteriota	Desulfovibrionia	Desulfovibrio	Desulfovibrio vulgaris ATCC 29579	American Type Culture Collection, Rockville, MD	Bioprecipitation and Bioreduction of U(VI)	H2-dependent U(VI) reduction. Cytochrome c3 + Hydrogenase > U(VI) reduction in the presence of H2	Reduction of Fe(III)	Lovley-1993b	https://journals.asm.org/doi/abs/10.1128/aem.59.11.3572-3576.1993
Pseudomonadota	Gammaproteobacteria	Citrobacter	Citrobacter sp.	-	Biomineralization of U(VI)	U accumulates as polycrystalline HUO2PO4 at the cell surface		Macaskie-1992	https://www.science.org/doi/abs/10.1126/science.1496397
Pseudomonadota	Gammaproteobacteria	Pseudomonas	Pseudomonas MGF-48	Electroplating effluent	Bioaccumulation and/or Biosorption of U(VI)	U accumulates inside the cell wall and envelope, at the cell surface, and intracellularly in a pH dependent manner; Na2CO3 and EDTA compete with U	Bioaccumulation of other metals (Pb, Cd, Cu, Ag, Ni)	Malekzadeh-2002	https://doi.org/10.1023/A:1015215718810
Myxococcota	Myxococcia	Anaeromyxobacter	Anaeromyxobacter dehalogenans strain 2CP-C		Biosorption and Bioreduction of U(VI)	Reduction of U(VI) to U(IV)O2(s) (uraninite); H2 and acetate can act as electron donor; product accumulates at the EPS	Reduction of Tc(VII) to Tc(IV)O2S	Marshall-2009
Thermodesulfobacteriota	Desulfovibrionia	Desulfovibrio	Desulfovibrio desulfuricans G20	J. Wall, University of Missouri, Columbia	Bioreduction of U(VI)	U(VI) reduction and immobilization of U(IV) at the cell membrane and extracellularly in the presence of carbonates	Reduction of SO42-	Marsili-2007
Actinomycetota	Actinomycetes	Arthrobacter	Arthrobacter sp. X34	Sub-surface soil from the Oak Ridge Field Research Center in Tennessee, USA	U(VI) resistant	Phosphatase-independent (?)		Martinez-2007	https://doi.org/10.1111/j.1462-2920.2007.01422.x
Bacillota	Bacilli	Bacillus	Bacillus spp. Y9-2	Sub-surface soil from the Oak Ridge Field Research Center in Tennessee, USA	Bioprecipitation of U(VI)	Acid phosphatase activity		Martinez-2007	https://doi.org/10.1111/j.1462-2920.2007.01422.x
Pseudomonadota	Gammaproteobacteria	Rahnella	Rahnella sp. Y9602	Sub-surface soil from the Oak Ridge Field Research Center in Tennessee, USA	Bioprecipitation of U(VI)	Acid phosphatase activity		Martinez-2007
Bacillota	Clostridia	Clostridium	Clostridium sp.	uranium mine	Bioreduction of U(VI)	-		Martins-2010	https://doi.org/10.1016/j.jhazmat.2010.08.009
Bacillota	Negativicutes	Sporotalea	Sporotalea sp.	uncontaminated site	Bioaccumulation and Bioreduction of U(VI)	-		Martins-2010	https://doi.org/10.1016/j.jhazmat.2010.08.009
Pseudomonadota	Acidithiobacillia	Acidithiobacillus	Acidithiobacillus ferrooxidans		Biosorption of U(VI)			Merroun-2001
Pseudomonadota	Acidithiobacillia	Acidithiobacillus	Acidithiobacillus ferrooxidans D2	Uranium mining waste piles	Biosorption of U(VI)	U(VI) complexation with phosphorus residues		Merroun-2002	https://doi.org/10.1007/978-3-642-55668-5_59
Pseudomonadota	Gammaproteobacteria	Pseudomonas	Pseudomonas migulae CIP 105470	Uranium mining waste piles (reference strain)	Biosorption of U(VI)	U(VI) formed complexes with phosphorus residues		Merroun-2002	https://doi.org/10.1007/978-3-642-55668-5_59
Pseudomonadota	Gammaproteobacteria	Pseudomonas	Pseudomonas stutzeri DSMZ 5190	Uranium mining waste piles (reference strain)	Biosorption of U(VI)	U(VI) formed complexes with phosphorus residues		Merroun-2002	https://doi.org/10.1007/978-3-642-55668-5_59
Pseudomonadota	Gammaproteobacteria	Pseudomonas	Pseudomonas stutzeri DSMZ 7136	Uranium mining waste piles (reference strain)	Biosorption of U(VI)	U(VI) formed complexes with phosphorus residues		Merroun-2002	https://doi.org/10.1007/978-3-642-55668-5_59
Bacillota	Bacilli	Bacillus	Bacillus sphaericus strain JG-A12	uranium mining waste pile near the town of Johanngeorgenstadt in Saxony, Germany	Biosorption of U(VI)	U(VI) coordinated with carboxyl (bidentate) and phosphate (monodentate) groups at the cell surface		Merroun-2005	https://doi.org/10.1128/AEM.71.9.5532-5543.2005
Actinomycetota	Actinomycetes	Microbacterium	Microbacterium oxydansS15-M2	S15 deep-well montoring site, Siberian radioactive subsurface depository in Tomsk-7, Russia	Bioprecipitation of U(VI)	-		Merroun-2006	https://doi.org/10.1524/ract.2006.94.9-11.723
Pseudomonadota	Alphaproteobacteria	Sphingomonas	Sphingomonas sp. S15-S1	S15 deep-well montoring site, Siberian radioactive subsurface depository in Tomsk-7, Russia	Bioprecipitation of U(VI)	Acid phosphatase activity		Merroun-2006	https://doi.org/10.1524/ract.2006.94.9-11.723
Bacillota	Bacilli	Bacillus	Bacillus sphaericus JG-7B	acidic sediment (pH 4.5) of a uranium mining waste pile near the town of Johanngeorgenstadt, Germany	Biomineralization of U(VI)	U biomineralization at pH 3.0 and 4.5 as a uranium phosphate mineral phase belonging to the meta-autunite group; acidic phosphatase; precipitate bound to cell wall; at pH 2.0, U(VI) formed complexes with organophosphate ligands		Merroun-2011	https://doi.org/10.1016/j.jhazmat.2011.09.049
Pseudomonadota	Alphaproteobacteria	Sphingomonas	Sphingomonas sp. S15-S1	groundwater 290-324m depth, S15 monitoring well, near nuclear waste repository site Tomsk-7 in Siberia, Russia	Biomineralization of U(VI)	U biomineralization at pH 3.0 and 4.5 as a uranium phosphate mineral phase belonging to the meta-autunite group; acidic phosphatase; precipitate bound to cell wall; at pH 2.0, U(VI) formed complexes with organophosphate ligands		Merroun-2011	https://doi.org/10.1016/j.jhazmat.2011.09.049
Thermoproteota	Thermoprotei	Metallosphaera	Metallosphaera prunae	smoldering heap on a uranium mine in Thüringen, Germany	U(VI) resistant	tolerated triuranium octaoxide (U3O8) and soluble uranium [U(VI)]; possibly by aborting transcription and translation		Mukherjee-2012	https://doi.org/10.1073/pnas.1210904109
Thermoproteota	Thermoprotei	Metallosphaera	Metallosphaera sedula	Pisciarelli Solfatara near Naples	Biooxidation of U(IV)	Oxidized solid U3O8 to soluble U(VI)		Mukherjee-2012	https://doi.org/10.1073/pnas.1210904109
Actinomycetota	Actinomycetes	Microbacterium	Microbacterium oxydans	Siberian radioactive waste depository	Bioprecipitation and Biosorption of U(VI)	Precipitated U extracellularly (pH 4.5); U bound to organophosphate groups (pH 2.0)		Nedelkova-2007	https://doi.org/10.1111/j.1574-6941.2006.00261.x
Pseudomonadota	Betaproteobacteria	Acidovorax	Acidovorax sp.	-	Bioreduction of U(VI)	-		Nyman-2006
Bacillota	Bacilli	Geobacillus	Geobacillus thermoleovorans subsp. stromboliensis		Biosorption of U(VI)	-		Ozdemir-2012	https://link.springer.com/article/10.1007/s00604-012-0841-2
Bacillota	Bacilli	Bacillus	Bacillus mojavensis	-	Biosorption of U(VI)	-		Ozdemir-2017a	https://doi.org/10.1016/j.jenvman.2016.11.004
Bacillota	Bacilli	Bacillus	Bacillus vallismortis	-	Biosorption of U(VI)	-		Ozdemir-2017b	https://www.sciencedirect.com/science/article/pii/S0265931X17301789
Pseudomonadota	Betaproteobacteria	Thiobacillus	Thiobacillus ferrooxidans ATCC 23270T	Coal mine	Bioaccumulation of U(VI)	Accumulates U intracellularly and on the surface of the cell wall in a manner dependent on pH	Oxidation of Fe(II)	Panak-1998	https://doi.org/10.1016/S0925-8388(98)00067-X
Pseudomonadota	Betaproteobacteria	Thiobacillus	Thiobacillus ferrooxidans ATCC 33020	Uranium mine	Bioaccumulation of U(VI)	Accumulates U intracellularly and on the surface of the cell wall in a manner dependent on pH	Oxidation of Fe(II)	Panak-1998	https://doi.org/10.1016/S0925-8388(98)00067-X
Thermodesulfobacteriota	Desulfovibrionia	Desulfovibrio	Desulfovibrio desulfuricans DSM 642T	Soil near a gas main and a culture enriched for sulfate-reducers from a uranium mine waste pile, Haberlandhalde, Johanngeorgenstadt, Saxony, Germany	Bioreduction of U(VI)	pH-dependent	Reduction of SO42-	Panak-1998	https://doi.org/10.1016/S0925-8388(98)00067-X
Pseudomonadota	Alphaproteobacteria	Caulobacter	Caulobacter crescentus	-	Biomineralization of U(VI)	-		Park-2014
Pseudomonadota	Betaproteobacteria	Burkholderia	Burkholderia sp. strain SRS-W-2-2016	Savannah River Site (SRS), USA	U(VI) resistant	-		Pathak-2017
Thermodesulfobacteriota	Desulfovibrionia	Desulfovibrio	Desulfovibrio desulfuricans G20	-	Bioreduction of U(VI)	-		Payne-2002
Thermodesulfobacteriota	Desulfovibrionia	Desulfovibrio	Desulfovibrio desulfuricans I2	-	Bioreduction of U(VI)	-		Payne-2002
Pseudomonadota	Betaproteobacteria	Acidovorax	Acidovorax sp. BoFeN1	-	U(VI) resistant	-		Peng-2018
Bacillota	Bacilli	Brevibacillus	~Brevibacillus reuszeri	enrichment cultures were initiated from contaminated (high in uranium, nitrate; low pH) subsurface sediments at pH 4 to 5 from the OR-FRC; amended with glucose	Bioreduction of U(VI)	Reduction of Fe(III)	Reduction of Fe(III)	Petrie-2003	https://doi.org/10.1128/AEM.69.12.7467-7479.2003
Bacillota	Bacilli	Paenibacillus	~Paenibacillus lautus	enrichment cultures were initiated from contaminated (high in uranium, nitrate; low pH) subsurface sediments at pH 7 and pH 4 to 5 from the OR-FRC; amended with glucose	Bioreduction of U(VI)	-	Reduction of Fe(III)	Petrie-2003	https://doi.org/10.1128/AEM.69.12.7467-7479.2003
Myxococcota	Myxococcia	Anaeromyxobacter	~Anaeromyxobacter dehalogenans	enrichment cultures were initiated from contaminated (high in uranium, nitrate; low pH) subsurface sediments at pH 7 from the OR-FRC	Bioreduction of U(VI)	Dissimilatory reduction of Fe(III)	Reduction of Fe(III)	Petrie-2003	https://doi.org/10.1128/AEM.69.12.7467-7479.2003
Thermodesulfobacteriota	Desulfovibrionia	Desulfovibrio	Desulfovibrio sp. UFZ B 490	Soil near a gas main and a culture enriched for sulfate-reducers from a uranium mine waste pile, Haberlandhalde, Johanngeorgenstadt, Saxony, Germany	Bioreduction of U(VI)	-	Reduction of SO42-	Pietzsch-1999	https://doi.org/10.1002/(SICI)1521-4028(199912)39:5/6<365::AID-JOBM365>3.0.CO;2-C
Bacillota	Bacilli	Bacillus	Bacillus sphaericus JG-A12	Uranium mining waste pile, Germany	Bioaccumulation and/or Biosorption of U(VI)	U accumulates at the cell envelope and in the S-layer	Bioaccumulation of other metals (Cu, Pb, Al, Cd)	Pollmann-2006	https://doi.org/10.1016/j.biotechadv.2005.06.002
Bacillota	Bacilli	Bacillus	Bacillus sphaericus strain JG-A12	Uranium mining waste pile	Bioaccumulation and/or Biosorption of U(VI)	U accumulates intracellularly, in the S-layer, and in spores	Biosorption of Cu	Raff-2002	https://doi.org/10.1007/978-3-642-55668-5_72
Bacillota	Bacilli	Bacillus	Bacillus sphaericus strain JG-A12	Uranium mining waste pile	Bioaccumulation and/or Biosorption of U(VI)	U accumulates intracellularly, in the S-layer, and in spores	Biosorption of Cu	Raff-2003	https://doi.org/10.1021/cm021213l
Bacillota	Negativicutes	Pelosinus	Pelosinus strain UFO1	Field Research Center (FRC) in Oak Ridge, TN	Bioprecipitation and Bioreduction of U(VI)	U(VI) removal from solution via reductive and phosphate precipitation mechanisms; anthraquinone-2,6-disulfonate (AQDS) increased the rate of U(VI) removal		Ray-2011	https://doi.org/10.1016/j.gca.2011.02.040
Bacillota	Bacilli	Paenibacillus	Paenibacillus sp. JG-TB8	Uranium mining waste pile	Biomineralization of U(VI)	Biomineralization occurs under aerobic conditions; under anaerobic conditions, phosphatase activity was suppressed at pH 4.5, 6.0	Facultative anaerobe	Reitz-2014	https://journals.plos.org/plosone/article?id=10.1371/journal.pone.0102447
Myxococcota	Myxococcia	Anaeromyxobacter	Anaeromyxobacter dehalogenans strain K	-	Bioreduction of U(VI)	-		Rui-2013
Pseudomonadota	Gammaproteobacteria	Shewanella	Shewanella putrefaciens CN32	-	Bioreduction of U(VI)	-		Rui-2013
Thermodesulfobacteriota	Desulfuromonadia	Geobacter	Geobacter sulfurreducens strain PCA	-	Bioreduction of U(VI)	-		Rui-2013
Actinomycetota	Actinomycetes	Arthrobacter	Arthrobacter sp.	-	U(VI) resistant	-		Sanchez-Castro-2017
Actinomycetota	Actinomycetes	Microbacterium	Microbacterium oxydans	-	U(VI) resistant	-		Sanchez-Castro-2017
Pseudomonadota	Gammaproteobacteria	Pseudomonas	Pseudomonas aeruginosa DPs-13	-	Biosorption of U(VI)	-		Sarma-2012
Pseudomonadota	Gammaproteobacteria	Serratia	Serratia spp.	Sediments of U ore deposit, Domiasiat, India	U(VI) resistant	-		Sarma-2016	https://doi.org/10.1007/s40011-013-0236-0
Pseudomonadota	Alphaproteobacteria	Rhodobacter	Rhodobacter sphaeroides SSI	-	Biosorption of Cs	-		Sasaki-2013	http://dx.doi.org/10.4236/abb.2013.41002
Pseudomonadota	Alphaproteobacteria	Rhodobacter	Rhodobacter sphaeroides SSI	-	Biosorption of Cs	-		Sasaki-2013	http://dx.doi.org/10.4028/www.scientific.net/AMR.1091.125
Pseudomonadota	Alphaproteobacteria	Rhodobacter	Rhodobacter sphaeroides SSI	-	Biosorption of Sr	-		Sasaki-2013	http://dx.doi.org/10.4236/abb.2013.41002
Myxococcota	Myxococcia	Anaeromyxobacter	Anaeromyxobacter sp.	-	U(VI) resistant	-		Sharp-2009
Pseudomonadota	Gammaproteobacteria	Shewanella	Shewanella sp.	-	U(VI) resistant	-		Sharp-2009
Thermodesulfobacteriota	Desulfovibrionia	Desulfovibrio	Desulfovibrio sp.	-	U(VI) resistant	-		Sharp-2009
Thermodesulfobacteriota	Desulfuromonadia	Geobacter	Geobacter sp.	-	U(VI) resistant	-		Sharp-2009
Thermodesulfobacteriota	Desulfuromonadia	Geobacter	Geobacter uraniireducens sp. nov. Rf4T	Subsurface sediments undergoing uranium bioremediation	Bioreduction of U(VI)	-	Reduction of Fe(III) coupled to oxidation of acetate	Shelobolina-2007
Pseudomonadota	Gammaproteobacteria	Shewanella	Shewanella oneidensis MR-1	-	Biosorption of U(VI)	U formed complexes on the cell surface in a pH-dependent manner		Sheng-2013	https://doi.org/10.1016/j.chemgeo.2013.08.039
Pseudomonadota	Gammaproteobacteria	Shewanella	Shewanella putrefaciens CN32	-	U(VI) resistant	-		Singer-2009
Actinomycetota	Actinomycetes	Cellulomonas	Cellulomonas sp. strain ES6	-	Bioprecipitation and Bioreduction of U(VI)	Release of inorganic phosphate (?)	Facultative anaerobe	Sivaswamy-2010
Pseudomonadota	Gammaproteobacteria	Acinetobacter	Acinetobacter sp. YU-SS-SB-29	Site with high natural background radiation	Bioprecipitation of U(VI)	Solubilizes phosphate by releasing organic acids; uranyl phosphate formation		Sowmya-2014	https://doi.org/10.1016/j.ibiod.2014.07.009
Pseudomonadota	Betaproteobacteria	Castellaniella	~Castellaniella defragrans	Ethanol-biostimulated high-nitrate, acidic sediments from OR-FRC	Nitrate reduction (?)	nirK (Dissimilatory nitrate reductase)		Spain-2007	https://doi.org/10.1128/AEM.00331-07
Pseudomonadota	Betaproteobacteria	Castellaniella	~Castellaniella denitrificans	Ethanol-biostimulated high-nitrate, acidic sediments from OR-FRC	Nitrate reduction (?)	nirK (Dissimilatory nitrate reductase)		Spain-2007	https://doi.org/10.1128/AEM.00331-07
Bacillota	Clostridia	Clostridium	Clostridium sp.	Mud sample taken from a bioreactor used for the treatment of acid mine drainage	Bioreduction of U(VI)	Reduction of SO42- increases the rate of U(VI) reduction	Reduction of SO42-	Spear-2000	https://doi.org/10.1128/AEM.66.9.3711-3721.2000
Thermodesulfobacteriota	Desulfovibrionia	Desulfovibrio	Desulfovibrio desulfuricans ATCC 7757	Mud sample taken from a bioreactor used for the treatment of acid mine drainage	Bioreduction of U(VI)	Reduction of SO42- increases the rate of U(VI) reduction	Reduction of SO42-	Spear-2000	https://doi.org/10.1128/AEM.66.9.3711-3721.2000
Thermodesulfobacteriota	Desulfovibrionia	Desulfovibrio	Desulfovibrio vulgaris	Mud sample taken from a bioreactor used for the treatment of acid mine drainage	Bioreduction of U(VI)	Reduction of SO42- increases the rate of U(VI) reduction	Reduction of SO42-	Spear-2000	https://doi.org/10.1128/AEM.66.9.3711-3721.2000
Pseudomonadota	Gammaproteobacteria	Pseudomonas	Pseudomonas aeruginosa CSU	H. R. Meyer and S. Johnson, Colorado State University	Bioaccumulation and/or Biosorption of U(VI)	Accumulates U intracellularly, extremely fast		Strandberg-1981	https://doi.org/10.1128/aem.41.1.237-245.1981
Bacillota	Clostridia	Clostridium	Clostridium sp.	U-contaminated sediment collected from an inactive open-pit uranium mine; Midnite mine, Stevens County, WA, USA	Bioreduction of U(VI)	-	Fermentative	Suzuki-2003	https://doi.org/10.1128/AEM.69.3.1337-1346.2003
Bacillota	Clostridia	Desulfosporosinus	Desulfosporosinus spp.	U-contaminated sediment collected from an inactive open-pit uranium mine; Midnite mine, Stevens County, WA, USA	Bioreduction of U(VI)	Reduction of SO42- increases the rate of U(VI) reduction	Reduction of SO42-	Suzuki-2003	https://doi.org/10.1128/AEM.69.3.1337-1346.2003
Actinomycetota	Actinomycetes	Arthrobacter	~Arthrobacter ilicis	Material from the pit of the inactive, open-pit Midnite mine in Washington, USA (pH 4, 20 ppm U)	Bioaccumulation of U(VI)	Accumulates U intracellularly as precipitates closely associated with phosphate granules		Suzuki-2004	https://doi.org/10.1524/ract.92.8.481.39281
Actinomycetota	Actinomycetes	Arthrobacter	~Arthrobacter ramosus	acidic pH 4 pit with 20 ppm U at Midnite mine, an inactive open-pit uranium mine, located in Stevens County, eastern Washington, USA	No uranium was detected by EDX or TEM	U(VI) resistant		Suzuki-2004	https://doi.org/10.1524/ract.92.8.481.39281
Actinomycetota	Actinomycetes	Rhodococcus	~Rhodococcus globerulus	acidic pH 4 pit with 20 ppm U at Midnite mine, an inactive open-pit uranium mine, located in Stevens County, eastern Washington, USA	U(VI) resistant	-		Suzuki-2004	https://doi.org/10.1524/ract.92.8.481.39281
Bacillota	Bacilli	Bacillus	~Bacillus cereus	acidic pH 4 pit with 20 ppm U at Midnite mine, an inactive open-pit uranium mine, located in Stevens County, eastern Washington, USA	U(VI) resistant	-		Suzuki-2004	https://doi.org/10.1524/ract.92.8.481.39281
Bacillota	Bacilli	Bacillus	~Bacillus pumlis	acidic pH 4 pit with 20 ppm U at Midnite mine, an inactive open-pit uranium mine, located in Stevens County, eastern Washington, USA	U(VI) resistant	-		Suzuki-2004	https://doi.org/10.1524/ract.92.8.481.39281
Deinococcota	Deinococci	Deinococcus	Deinococcus radiodurans R1	-	Bioprecipitation of U(VI)	Extracellular precipitation of uranyl phosphate mineral nanocrystals; phosphate release during cell lysis (?)	Radiation resistance	Suzuki-2004	https://doi.org/10.1080/01490450490266361
Bacillota	Clostridia	Desulfosporosinus	Desulfosporosinus spp.	-	Bioreduction of U(VI)	-		Suzuki-2004b
Actinomycetota	Actinomycetes	Rhodococcus	Rhodococcus erythropolis CS98	-	Bioaccumulation of Cs	-		Takei-2014	https://doi.org/10.1016/j.jbiosc.2013.09.013
Bacillota	Clostridia	Desulfotomaculum	Desulfotomaculum reducens sp. nov. strain MI-1	HM-contaminated sediments in Mare Island Naval Shipyard, San Francisco Bay estuary, CA, USA	Bioreduction of U(VI)	Uses metals (U(VI), Cr(VI), Mn(IV), Fe(III)) as electron acceptors for growth in the absence of SO42-	Reduction of SO42-	Tebo-2006	https://doi.org/10.1111/j.1574-6968.1998.tb12998.x
Actinomycetota	Actinomycetes	Microbacterium	Microbacterium sp. A9	Soil from Chernobyl, Ukraine	Bioprecipitation of U(VI)	Intracellular accumulation as autunite mineral due to phosphate released by an active mechanism		Theodorakopoulos-2015	https://doi.org/10.1016/j.jhazmat.2014.12.018
Bacillota	Negativicutes	Pelosinus	Pelosinus sp. strain UFO1	Oak Ridge Field Research Center in Tennessee, USA	Biosorption of U(VI)	-		Thorgersen-2017	https://journals.asm.org/doi/full/10.1128/aem.03044-16
Bacillota	Bacilli	Bacillus	Bacillus subtilis	-	Biosorption of U(VI)	U adsorption in a pH-dependent manner	Adsorption capacity: 376.64 mg U/g	Tong-2017	https://www.tandfonline.com/doi/full/10.2147/NSA.S104808
Pseudomonadota	Gammaproteobacteria	Shewanella	Shewanella alga BrY	-	Bioreduction of U(VI)	O2 delays but does not prevent reduction	Reduction of Fe(III)	Truex-1997	https://doi.org/10.1002/(SICI)1097-0290(19970805)55:3<490::AID-BIT4>3.0.CO;2-7
Actinomycetota	Actinomycetes	Streptomyces	Streptomyces levoris	-	Biosorption of U(VI)	-		Tsuruta-2004	https://doi.org/10.1016/S1389-1723(04)70203-0
Bacillota	Bacilli	Lactobacillus	Lactobacillus sp.	Uranium mine, Japan	Biosorption of U(VI)	-		Tsuruta-2006	https://doi.org/10.1080/18811248.2006.9711174
Pseudomonadota	Gammaproteobacteria	Shewanella	Shewanella putrefaciens strain 200	-	Bioreduction of U(VI)			Wade-2000
Deinococcota	Deinococci	Thermus	Thermus sp. TibetanG7	hot springs in Tibet, China	Accumulation of Cs	Inhibition of K+ and Na+		Wang-2007	https://doi.org/10.1007/s11434-007-0353-3
Pseudomonadota	Gammaproteobacteria	Pseudomonas	Pseudomonas sp. LYF26	-	Biosorption and Bioaccumulation of Cd	CdCO3 and Cd3(PO4)2		Wang-2024	https://doi.org/10.1016/j.chemosphere.2024.141156
Pseudomonadota	Gammaproteobacteria	Citrobacter	Citrobacter freudii	-	Biosorption of U(VI)	U interacted with carboxyl groups		Xie-2008	https://doi.org/10.1016/j.jenvrad.2007.07.003
Pseudomonadota	Alphaproteobacteria	Caulobacter	Caulobacter crescentus	-	Bioprecipitation of U(VI)	phoY (whole cell phosphatase activity)		Yung-2014	https://journals.asm.org/doi/full/10.1128/aem.01050-14
Cyanobacteriota	Cyanophyceae	Pseudanabaena	Pseudanabaena catenata	cyanobacterial blooms in the First-Generation Magnox Storage Pond (FGMSP) at a UK nuclear site	Bioaccumulation of Cs	Cs accumulates in cytoplasm; proteins related to stress responses and K/P limitation were stimulated		Zhang-2022	https://doi.org/10.1016/j.jhazmat.2022.130556
